# Supplementary material
Source: HighWire-hosted journal article supplement (https://diabetes.diabetesjournals.org/content/suppl/2007/08/14/db06-0757)

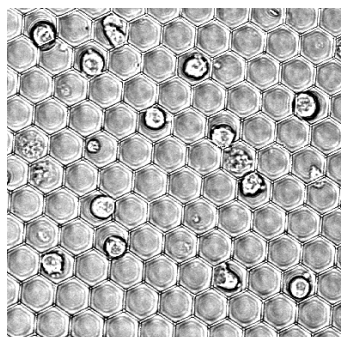

**BF**

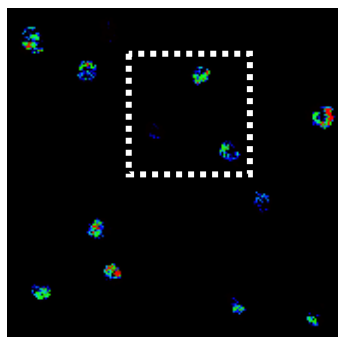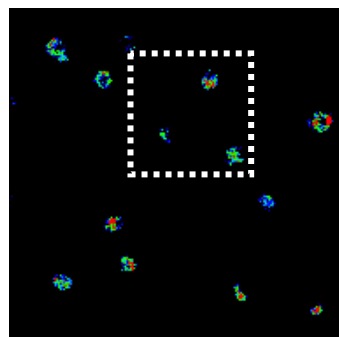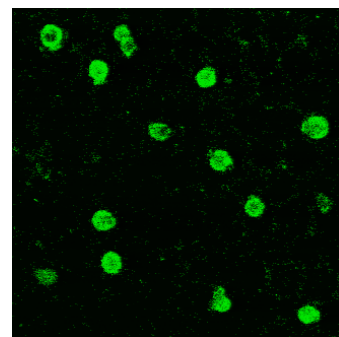

**Insulin  
Immuno-staining**

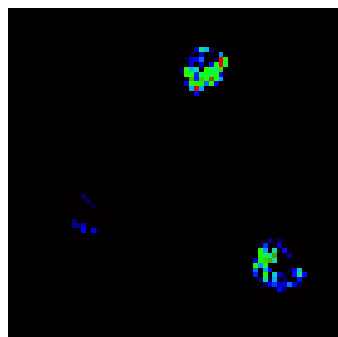

**3 mM glucose  
TMRE**

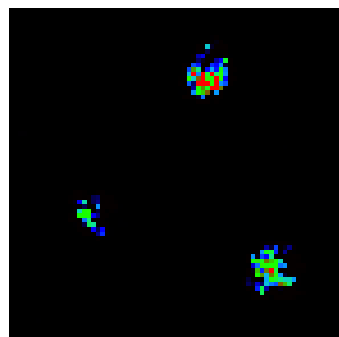

**8 mM glucose  
TMRE**

# Table 1

**Fluorescence intensity  
change 3-8 mM glucose**

| <b>Cell #</b> | <b>%</b> |
|---------------|----------|
| 1             | 4.4      |
| 2             | 10.2     |
| 3             | 30.4     |
| 4             | 15.2     |
| 5             | 3.5      |
| 6             | 18.8     |
| 7             | 11.6     |
| 8             | 21.3     |
| 9             | -2.4     |
| 10            | 9.5      |
| 11            | 39.2     |
| 12            | 14.5     |
| 13            | 9.4      |

Fig. S2

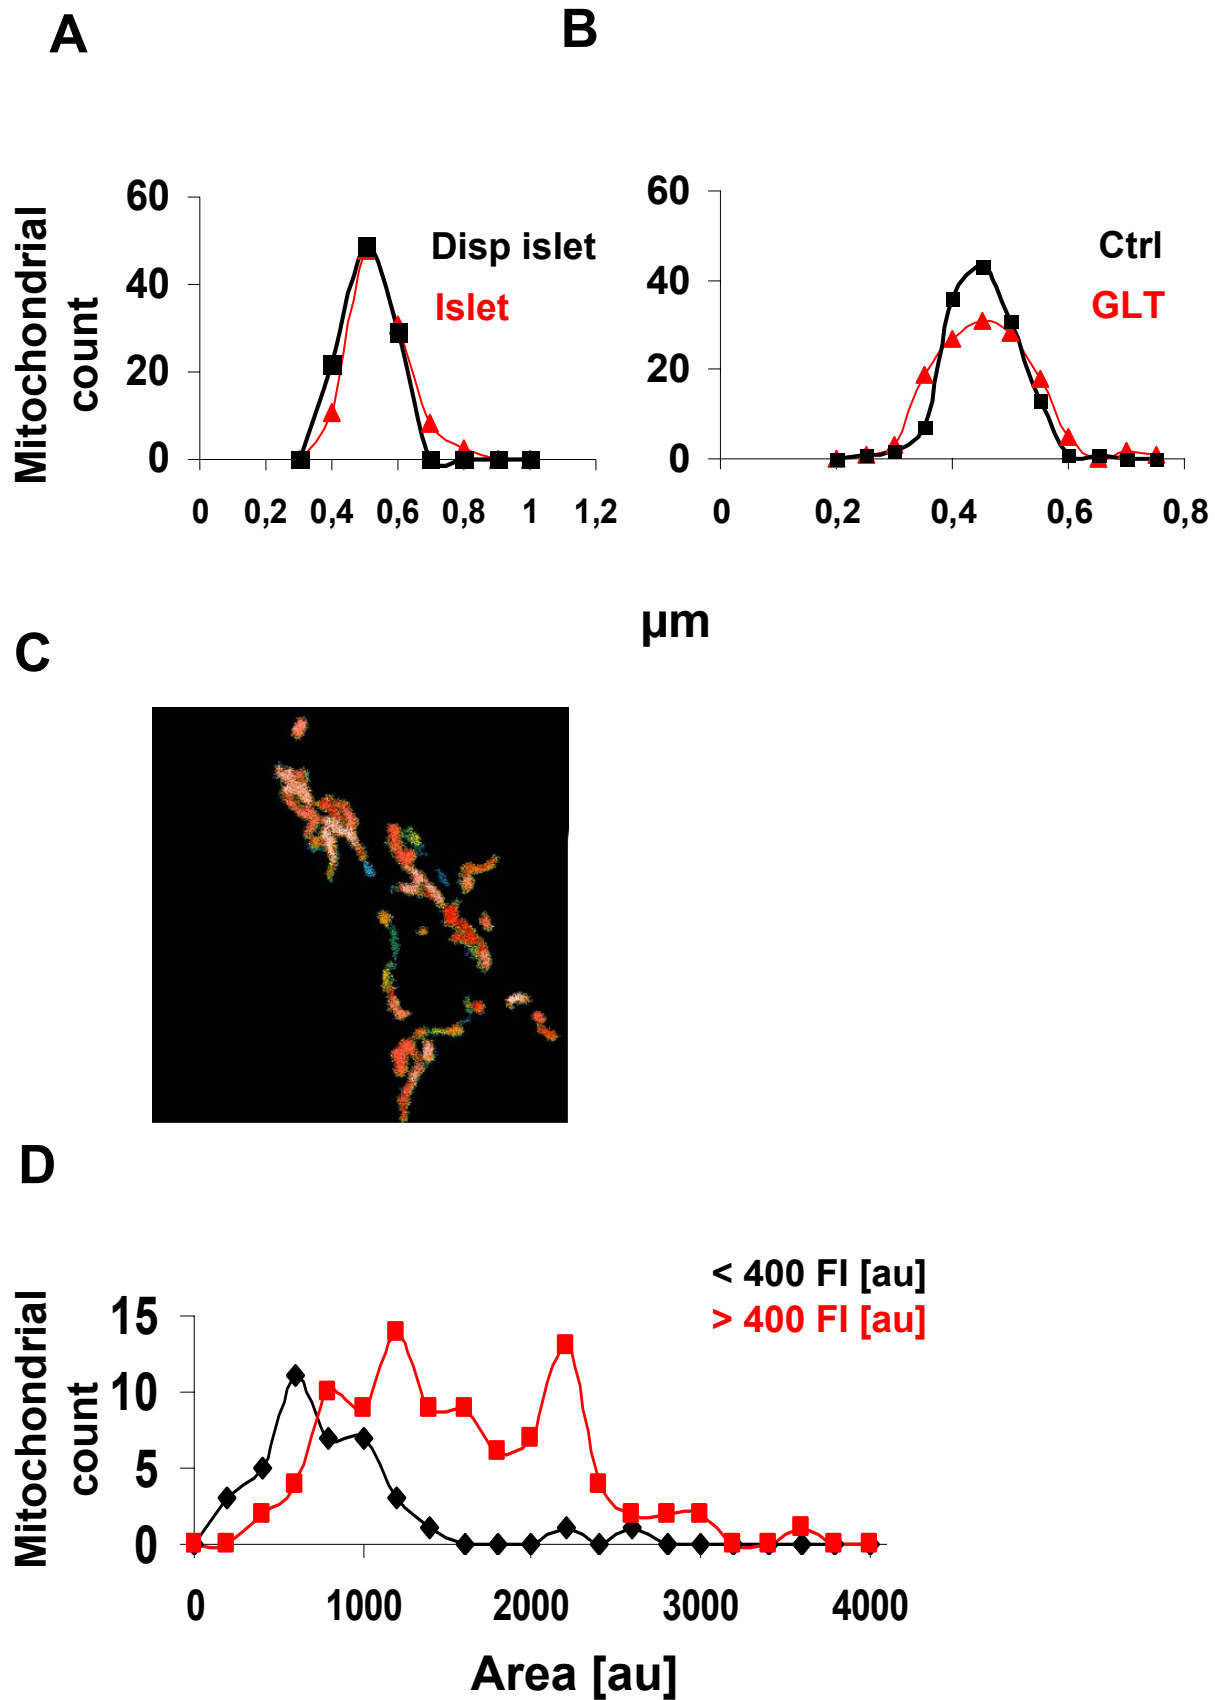

**Fig. S3****A****Heterogeneity change consecutive scans**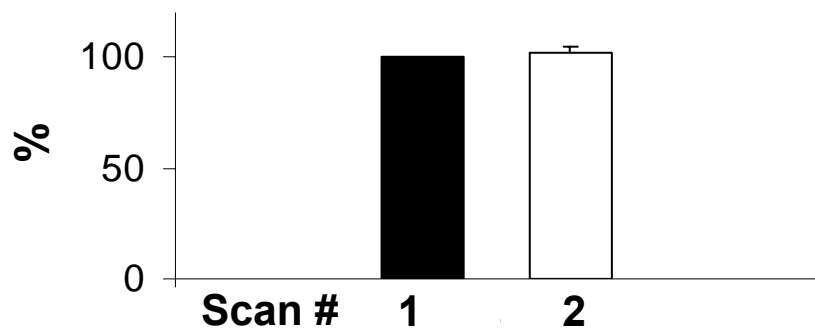**B**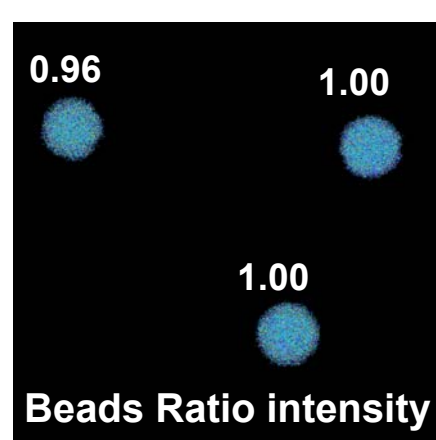**C**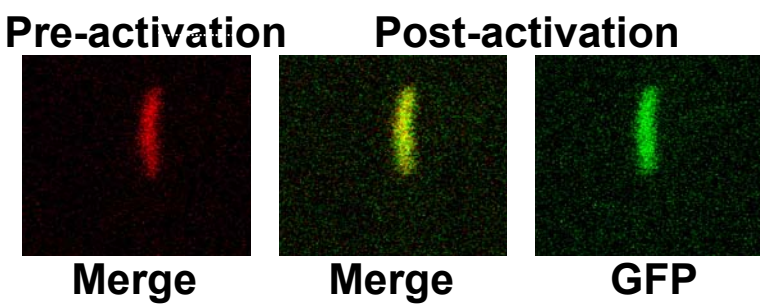**D**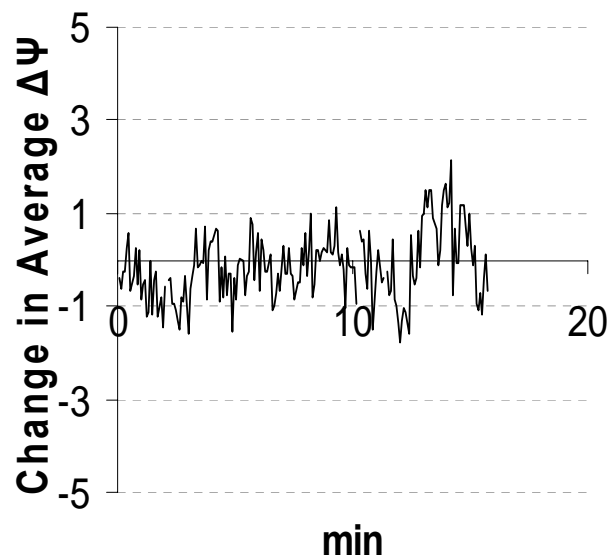**E**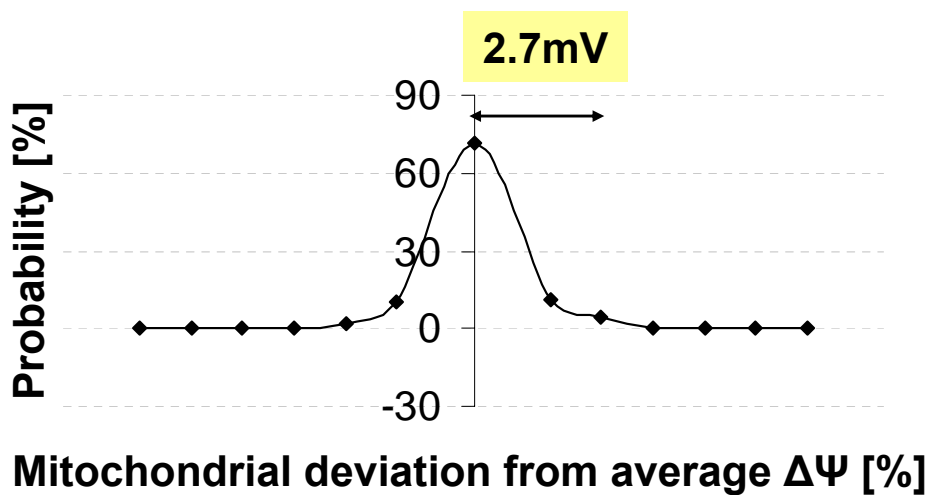

Supplement: DB06-0757OnlineAppendixFigsTab.pdf [file DB06-0757OnlineAppendixFigsTab.pdf]
